**Full title:** Community health worker knowledge, attitudes and practices towards COVID-19: learnings from an online cross-sectional survey using a digital health platform, UpSCALE, in Mozambique

**Short title:** Community health worker knowledge, attitudes and practices towards COVID-19

Authors: Mitra Feldman<sup>1</sup>; Vera Lacey Krylova<sup>2</sup>; Poppy Farrow<sup>2</sup>; Laura Donovan<sup>2</sup>; Edson Zandamela<sup>3</sup>; Joaquim Rebelo<sup>3</sup>; Maria Rodrigues<sup>3</sup>; Antonio Buló<sup>3</sup>; Carlos Ferraz<sup>3</sup>; Juan Romero Gonzalez<sup>4</sup>; Humberto Rodrigues<sup>5</sup>; Arantxa Roca-Feltre<sup>2</sup>; Kevin Baker<sup>2,6</sup>.

Affiliations:

1. Independent Consultant, Costa Rica.
2. Malaria Consortium, London, United Kingdom.
3. Malaria Consortium, Maputo, Mozambique.
4. Dimagi, Cape Town, South Africa.
5. Republic of Mozambique Ministry of Health, Maputo, Mozambique.
6. Department of Global Public Health, Karolinska Institute, Stockholm, Sweden.

Corresponding author: Dr Kevin Baker, [k.baker@malariaconsortium.org](mailto:k.baker@malariaconsortium.org)

**Abstract word count 293**

## Abstract

Healthcare workers (HCWs) are at the frontline of the Coronavirus Disease 2019 (COVID-19) pandemic response, yet there is a paucity of literature on their knowledge, attitudes and practices (KAP) in relation to the pandemic. Community Health Workers (CHWs) in Mozambique are known locally as agentes polivalentes elementares (APEs). While technical guidance surrounding COVID-19 is available to support APEs, communicating this information has been challenging due to restrictions on travel, face-to-face group meetings and training, imposed from May to August 2020. A digital health platform, upSCALE, that already supports 1,213 APEs and 299 supervisors across three provinces, is being used to support APEs on effective COVID-19 management by delivering COVID-19 sensitive SMS messages, training modules and a COVID-19 KAP survey.

The KAP survey, conducted from June 2020 to August 2020, consisted of 10 questions. Of 1,065 active upSCALE APEs, 28 percent completed the survey. Results indicate that only a small proportion of APEs listed the correct COVID-19 symptoms, transmission routes and appropriate prevention measures (25 percent, 16 percent and 39 percent, respectively) specifically included in national health education materials. Misconceptions were mainly related to transmission routes, high risk individuals and asymptomatic patients. 84 percent said they followed all government prevention guidelines. The results from the KAP survey were used to support the rapid development and deployment of targeted COVID-19 awareness and education materials for the APEs. SMS messages were continually adjusted based on the KAP survey results and a series of seven COVID-19 training modules were developed and disseminated. A follow-up KAP survey is planned for November 2020.

Adapting the existing upSCALE platform enabled a better understanding, in real time, of the KAP of APEs around COVID-19 management. Subsequently, supported improved delivery of tailored messages and education, vital for ensuring a successful COVID-19 response.

**Key words:** knowledge attitudes and practices, survey, questionnaire, KAP, mHealth, community health workers, APEs, Mozambique, COVID-19, Coronavirus, SARS-COV-2

## Introduction

Coronavirus Disease 2019 (COVID-19) is a rapidly expanding pandemic caused by a novel human coronavirus: severe acute respiratory syndrome coronavirus 2 (SARS-COV-2) (1). It was first reported in December 2019 among patients with viral pneumonia symptoms in Wuhan, China (2). As of 12 October 2020, there have been 37,423,660 confirmed cases of COVID-19, including 1,074,817 deaths, reported to WHO (3). To date, the African continent appears to be one of the least affected regions in the world with 1,594,750 cases and 38,570 deaths (4), but the numbers are increasing (5). Mozambique reported its first imported COVID-19 case on March 22, 2020 and has seen an increase in cases since then (6). As of 12 October there have been a total of 10,001 confirmed cases and 71 related deaths in the country (3).

COVID-19 is transmitted from person-to-person through inhalation of aerosols from an infected individual (7). Older adults and patients with pre-existing illnesses (like hypertension, cardiac disease, lung disease, cancer, or diabetes) have been identified as potential risk factors for severe disease and mortality (8). To date, there is no antiviral curative treatment or vaccine that has been recommended for COVID-19 (9). More information about its distribution, transmission, pathophysiology, treatment, and prevention are being studied. Infection by SARS-CoV-2 in humans occurs mainly through close contact through respiratory droplets, by direct contact with infected persons, or by contact with contaminated objects and surfaces (10). Primary preventive measures include frequent hand washing for a minimum of 20 seconds at a time, maintaining social distance, and respiratory hygiene (covering mouth and nose while coughing or sneezing) (11).

Healthcare workers (HCWs) are at the frontline of the COVID-19 pandemic response (12), yet there is a paucity of literature on their knowledge, attitudes and practices (KAP) in relation to the COVID-19 pandemic. One HCW KAP study, focused on Asian HCWs and medical students, revealed that a

significant proportion (61 percent) had poor knowledge of its transmission (13). A study in Uganda, among hospital based HCWs, found that only 69 percent had sufficient knowledge of the disease, although a higher percentage (74 percent) reported practicing good prevention measures (14). One HCW study in Pakistan showed higher knowledge (93 percent) and good practice (89 percent) regarding COVID-19 (15). Findings from another HCW KAP study in Nepal found 82 percent of respondents had good to moderate knowledge of COVID-19 and 84 percent had good prevention practices (16). In a study among HCWs in China, 89 percent of HCWs had sufficient knowledge of COVID-19 and 90 percent followed correct practices regarding COVID-19 prevention, yet more than 85 percent feared self-infection with the virus (17).

Other KAP studies, in Nigeria and Tanzania, have focused on the KAP of COVID-19 among community residents. Residents from a study in Northern Nigeria showed high level of awareness of COVID-19 and prevention methods (99 percent and 95 percent, respectively). However, a lower percentage (80 percent) said they follow government guidelines for prevention (18). In the Tanzanian study, 84 percent of the participants had a good knowledge of COVID-19 (19). Similar community based KAP studies have been conducted in China, the Philippines and Malaysia. A Chinese residents' KAP survey towards COVID-19, conducted during the rapid rise period of the outbreak, showed that COVID-19 knowledge was 90 percent and that nearly all of the participants (98 percent) wore masks when going out (20). In a survey among poor households in the Philippines, 94 percent of respondents were aware of COVID-19 and 82 percent were aware of appropriate preventive measures to protect people from infection (21). The Malaysia survey indicated that 81 percent had good knowledge of COVID-19, however, there was noticeable confusion among participants regarding transmission of the virus. Only 43 percent of participants answered correctly when asked if the virus was airborne and just 36 percent answered correctly when asked if eating and touching wild animals could result in infection (22). To our knowledge, there have been no published studies from sub-Saharan Africa to assess KAP toward COVID-19 specifically among community health workers (CHWs).

In Mozambique, CHWs, known locally as agentes polivalentes elementares (APEs), are community members who are trained to provide basic healthcare services and conduct health promotion activities in the remote areas in which they live. This includes providing integrated community case management (iCCM) for malaria, pneumonia and diarrhoea for children aged 2-59 months and, as of 2014, family planning, pregnancy tracking, antenatal and post-partum care. While technical guidance surrounding COVID-19 surveillance, case definitions and testing strategies are available to support APEs, communicating this information to the wider APE network has been a significant challenge. These have been largely due to restrictions on travel and face-to-face group meetings and training, which were in place from the beginning of April through to the beginning of August, when routine face-to-face activities were resumed. Other challenges include incorporating COVID-19 surveillance into existing surveillance networks and diagnosing COVID-19 within the community, due to the similarity of symptoms with other routinely presented diseases such as malaria and pneumonia. Furthermore, due to the novelty of COVID-19, the information available globally is constantly evolving and expanding, and this in turn requires continuous reflection and analysis in terms of the impact on country strategies and plans. This, combined with limited data on community-level caseload due to a lack of accessible and affordable tests, poses significant challenges in the APEs' abilities to conduct their routine activities and support the COVID-19 response. There is need for a dynamic, rapid response model to effectively support APEs on COVID-19 management.

The [upSCALE project](#), supported by UK AID (via UNICEF), is a continuation of the Bill and Melinda Gates Foundation supported inSCALE project. It consists of a smartphone app that guides APEs through patient registration, assists with diagnosis and advises on treatment and referrals (primarily related to iCCM), and a tablet-based app that allows supervisors to monitor CHW performance and stock levels. Data entered by APEs through the upSCALE app is visualised in the District Health Information System (DHIS2) at district, provincial and national levels of Mozambique's health system. The app has the potential to analyse local disease-specific trends in near real-time, which will allow managers to improve their resource allocation. The programme is currently being

implemented in three provinces (Inhambane, Cabo Delgado and Zambézia) with 1,213 APEs and 299 supervisors using the app. The MoH is planning to roll out the platform to 8,800 APES nationally by 2021.

Given the lack of sufficient accurate and up-to-date information on COVID-19, especially in rural communities, there is a risk of high levels of disinformation, and possible questionable practices. At the same time, the most up-to-date advice about COVID-19 symptoms (which is constantly changing as we learn more about the virus) and how to protect community members from getting infected and infecting others might not reach all community members timely and/or effectively. The use of the upSCALE app presents a dynamic solution for COVID-19 messaging and tracking, capable of adapting and expanding messages as new info/ practices arise, also allowing to capture how communities are adapting to living in a pandemic such as COVID-19. In this study, we investigate the KAP of APEs who use a digital health platform UpSCALE, in three provinces in Mozambique. This is the first report on the knowledge, attitude, and practices of these community health workers from Mozambique. Findings from this study should contribute to the global and local efforts to better control the COVID-19 pandemic.

## Methods

To support the COVID-19 response in Mozambique, Malaria Consortium, in partnership with Ministry of Health and Dimagi, rapidly expanded the upSCALE platform and the use of telemedicine - through the use of short message service (SMS), training modules, monitoring of key indicators on routine services for women and children, stock control and disease surveillance.

A COVID-19 KAP survey was developed and delivered to the APEs via upSCALE from 9 June 2020 to 14 August 2020. The KAP was a cross-sectional study that was sent to all 1,400 upSCALE registered APEs and involved those who responded to an invitation via SMS message, asking them to complete

the questionnaire on the UPSCALE application. The SMS messages were accompanied by simple videos demonstrating how to install and complete the KAP survey on the application.

The KAP survey questionnaire (see Annex I) was developed using various references including the WHO survey tools, guidance on COVID-19 insights and previous KAP surveys conducted during the pandemic (20, 23, 24). The self-reported and respondent-friendly survey consisted of 10 questions related to COVID-19 symptoms, prevention and transmission, as well as main sources of information. The components of the knowledge section included the causes and modes of COVID-19 transmission, main symptoms, transmissibility from asymptomatic patients, individuals at risk and preventive measures. The attitudes and practices sections were comprised of questions related to COVID-19 preventive measures practiced, adherence to government prevention measures, barriers to following recommended measures and what to do when symptoms occur.

From May 1<sup>st</sup> – September 1<sup>st</sup>, COVID-19 sensitive SMS messages were sent to the APEs. Initially rolled out only to those APEs using the upSCALE app. Malaria Consortium recommended to the MoH that APEs not using the upSCALE app were included in the SMS COVID-19 sensitive messaging campaign and were sent the same COVID-19 SMS messages. The MoH agreed with this and through their support and engagement with the regional health teams, 1,000 additional APEs were added to the SMS deployment database. As of 1<sup>st</sup> September, a total of 140,895 COVID-19 sensitive SMS messages have been sent to the APEs.

## Results

Of the 1,456 APEs registered with the upSCALE app, 1,065 had operational phones at the time of the KAP survey and 297 of these completed the questionnaire (28 percent) over a three month period. Of these, 48 percent were from Cabo Delgado, 11 percent from Inhambane, and 41 percent from Zambézia. It took the respondents an average of five minutes to complete the survey. Female respondents made up 24 percent of those who completed the questionnaire.

*Table 1 Demographic characteristics of respondents (N=297)*

| Characteristic   |                   | Number | Percentage (%) |
|------------------|-------------------|--------|----------------|
| Gender           | Male              | 226    | 76             |
|                  | Female            | 71     | 24             |
| Age              | 18-29             | 83     | 28             |
|                  | 30-49             | 97     | 33             |
|                  | Above 50          | 117    | 39             |
| Province         | Cabo Delgado      | 143    | 48             |
|                  | Inhambane         | 33     | 11             |
|                  | Zambezia          | 121    | 41             |
| Years as an APes | 0-2 years         | 74     | 25             |
|                  | 3-5 years         | 109    | 37             |
|                  | More than 5 years | 114    | 38             |

The largest group of respondents said they had heard of COVID-19 through the local radio (27 percent), which was followed closely by their health facility (26 percent). Approximately 15 percent said they had heard of COVID-19 through the upSCALE app. A similar proportion (13 percent) had heard via word of mouth. Newspapers (nine percent) and television (five percent) were also mentioned. A very small percentage mentioned government websites (two percent) and social media (1 percent). A few respondents (1 percent) said they had not heard of COVID-19 through any source.

*Table 2 Participants sources of knowledge of COVID-19 (N=297)*

| Question | Option | Proportion selected (%) |
|----------|--------|-------------------------|
|----------|--------|-------------------------|

---

|                                                                                  |                                              |    |
|----------------------------------------------------------------------------------|----------------------------------------------|----|
| 1. Where do you hear or see the messages about COVID-19? (select all that apply) | Newspapers                                   | 9  |
|                                                                                  | Word-of-mouth                                | 13 |
|                                                                                  | Government website                           | 2  |
|                                                                                  | Local television                             | 5  |
|                                                                                  | Local radio                                  | 27 |
|                                                                                  | Through UpSCALE                              | 15 |
|                                                                                  | Health facility                              | 26 |
|                                                                                  | Other (please specify)                       | 1  |
|                                                                                  | I have not heard any messages about COVID-19 | 1  |

---

When looking at combined data from June – August 2020, 25 percent of respondents listed the correct three main symptoms of COVID-19, and no others (fever, cough and shortness of breath), as outlined in the Ministry of Health (MoH) guidelines (25). When asked to list all symptoms of COVID-19; headache was the most frequently listed symptom (98 percent), followed by fever and dry cough (both listed by 90 percent of respondents). Shortness of breath was also mentioned by 87 percent of respondents.

Regarding transmission routes, 16 percent listed the correct combination, according to MoH guidelines (direct contact with contaminated surfaces, respiratory droplets and direct contact with an infected person). When asked to list all possible transmission routes, direct contact with contaminated surfaces and objects was mentioned the most (91 percent), this was followed closely by direct contact with an infected person (90 percent) and respiratory droplets (89 percent). A large percentage (86 percent) thought the virus is airborne, and 83 percent mentioned the emptying of

latrines as a source of transmission. When presented with the statement “A person with COVID-19 without any symptoms cannot spread the virus,” 41% said it was true.

APEs were asked to list methods of COVID-19 prevention, with 39 percent listing the correct combination of preventions methods (wash hands, wear a mask, avoid touching your face, cover your mouth when you cough or sneeze, stay home if you feel unwell and practice social distancing of 1.5 meters). The most frequently listed method of prevention (when asked to list all) was covering your face while sneezing (97 percent). This was followed closely by staying home if you feel unwell (93 percent), avoiding touching your face, handwashing and wearing a mask (all mentioned by 92 percent of respondents), and maintaining a physical distance of 1.5 meters (91 percent).

Almost half of the APEs (45 percent) said that the minimum recommended handwashing length was one minute, followed by 10 seconds (21 percent), 20 seconds (16 percent), and 30 seconds (15 percent).

When asked who was at the greatest risk, less than 2 percent (1.24 percent) of respondents correctly identified elderly individuals, obese individuals and those with an underlying chronic illness. Those with chronic illness and obese individual were listed the most frequently (each mentioned by 98 percent), followed by elderly individuals (97 percent), pregnant women (3 percent) and children (40 percent).

The next survey question asked participants to list all actions someone should take when COVID-19 symptoms develop, 20 percent of respondents provided the right combination of answers, and according to government guidelines (self-isolate, get plenty of rest, stay hydrated and take paracetamol, contact your local health facility, wear a mask, and monitor symptoms regularly).

Overall, self-isolate was included the most (82 percent), followed by wear a face mask (52 percent), contact your local health facility (48 percent), monitor symptoms regularly (30 percent), get plenty of rest (28 percent), and stay hydrated and take paracetamol (24 percent).

Table 3 General knowledge of COVID-19 among respondent APES (N=297)

| Question                                                                                          | Options                                                                                   | Proportion selected (%) |
|---------------------------------------------------------------------------------------------------|-------------------------------------------------------------------------------------------|-------------------------|
| What are the three main clinical symptoms of COVID-19? (Select three)                             | Fever                                                                                     | 90                      |
|                                                                                                   | Headache                                                                                  | 98                      |
|                                                                                                   | Shortness of breath                                                                       | 87                      |
|                                                                                                   | Dry, persistent cough                                                                     | 90                      |
|                                                                                                   | Conjunctivitis                                                                            | 45                      |
|                                                                                                   | Fatigue                                                                                   | 50                      |
|                                                                                                   | Diarrhoea                                                                                 | 55                      |
|                                                                                                   | Loss of speech or movement                                                                | 10                      |
| Correct Answer                                                                                    | All three correctly selected                                                              | 25                      |
| Which of the below are at risk groups for COVID-19? (Select all that apply)                       | Elderly individuals (aged >70)                                                            | 97                      |
|                                                                                                   | Pregnant women                                                                            | 3                       |
|                                                                                                   | Those with chronic illnesses (e.g. heart disease, diabetes)                               | 98                      |
|                                                                                                   | Children                                                                                  | 40                      |
|                                                                                                   | Obese individuals                                                                         | 98                      |
| Which of the following are methods of preventing infection with COVID-19? (Select all that apply) | Washing hands regularly with soap and water, or cleaning them with alcohol-based hand rub | 92                      |
|                                                                                                   | Wearing a facemask                                                                        | 92                      |
|                                                                                                   | Avoid touching your face                                                                  | 92                      |

|                                                                                                                    |                                                                                                                                          |    |
|--------------------------------------------------------------------------------------------------------------------|------------------------------------------------------------------------------------------------------------------------------------------|----|
|                                                                                                                    | Cover your mouth and nose when coughing or sneezing                                                                                      | 97 |
|                                                                                                                    | Stay home if you feel unwell                                                                                                             | 93 |
|                                                                                                                    | Practice physical distancing by avoiding unnecessary travel, staying away from large groups of people and keeping 1.5m apart from others | 91 |
| Correct Answer                                                                                                     | All options correctly selected                                                                                                           | 39 |
| How is COVID-19 transmitted? (Select all that apply)                                                               | Through the air (airborne)                                                                                                               | 86 |
|                                                                                                                    | Contact with contaminated objects and surfaces                                                                                           | 91 |
|                                                                                                                    | Respiratory droplets                                                                                                                     | 89 |
|                                                                                                                    | Direct contact with infected persons                                                                                                     | 90 |
|                                                                                                                    | Emptying latrines and handling of waste                                                                                                  | 83 |
| Correct Answer                                                                                                     | All three correctly selected                                                                                                             | 16 |
| What is the minimum length of handwashing time recommended to effectively prevent onward transmission of COVID-19? | 10 seconds                                                                                                                               | 21 |
|                                                                                                                    | 20 seconds                                                                                                                               | 16 |
|                                                                                                                    | 30 seconds                                                                                                                               | 15 |

|                                                                                           |                                                              |    |
|-------------------------------------------------------------------------------------------|--------------------------------------------------------------|----|
|                                                                                           | 60 seconds                                                   | 45 |
| A person infected with COVID-19 who does not show symptoms cannot spread the coronavirus. | True                                                         | 41 |
|                                                                                           | False                                                        | 57 |
|                                                                                           | Unsure                                                       | 2  |
| If you have symptoms of COVID-19, what measures should be taken? (Select all that apply)  | Self-isolate by staying at home for at least 7 days          | 82 |
|                                                                                           | Get plenty of rest                                           | 28 |
|                                                                                           | Stay hydrated and take paracetamol                           | 24 |
|                                                                                           | Contact your local health facility or Alô Vida via telephone | 48 |
|                                                                                           | Wear a facemask                                              | 52 |
|                                                                                           | Monitor your symptoms regularly                              | 30 |

The majority of respondents (84 percent) said they followed all MoH prevention guidelines at all times, while 13 percent said they followed only some of the prevention guidelines (with wearing a mask being the most frequently cited) (Table 4). When asked “What is preventing you from fully protecting yourself” personal protective equipment (PPE) was mentioned by four percent. However, lack of PPE decreased over time, with seven percent mentioning it PPE in June, five percent in July and only two percent in August.

*Table 4 General attitudes and practices towards COVID-19 among respondent APEs (N=297)*

| Question | Options | Proportion selected (%) |
|----------|---------|-------------------------|
|----------|---------|-------------------------|

---

|                                                                                                                                |                           |    |
|--------------------------------------------------------------------------------------------------------------------------------|---------------------------|----|
| Do you adhere to the prevention measures set out by national health authorities? (E.g. regular handwashing, social distancing) | Yes – all of them         | 84 |
|                                                                                                                                | No                        |    |
|                                                                                                                                | Some of them or sometimes | 12 |
|                                                                                                                                | Don't know                | 4  |
|                                                                                                                                | No                        | 0  |

---

Another output from the KAP survey has been the development and deployment of seven Covid-19 sensitive health education modules, integrated onto upSCALE, including; hand and respiratory hygiene, safe use and disposal of PPE and waste management. All materials are supported with multi-media tools, such as training and deployment videos, to improve the technique and practice of using the COVID-19 elements of UpSCALE. A second KAP survey is planned for November 2020 to measure change in KAP indicators and evaluate the role of adaptive learning practices alongside digital health tools, to enhance the capacity of CHWs in this challenging Covid-19 pandemic.

## Discussion

Given the timing of the KAP survey at the start of the COVID-19 pandemic in Mozambique, during the first days of lockdown, and the fact that the survey was issued without the ability to provide training or supervision, the response rate to the survey, at 28 percent, was in-line with other KAP studies conducted in similar settings and with similar populations in Uganda and Nepal (9, 11). While it was important to recognise that already 15% of users relied on UpSCALE for their COVID-19 information, local radio and health centres are clearly important sources of information and should continue to be utilised to communicate COVID-19 education messages. Only a quarter of the

respondents were female, but since only 26 percent of the upSCALE app users are women, this proportion is to be expected.

There is a high level of knowledge of COVID-19 symptoms and transmission routes among the APEs. However, only 25 percent selected all correct symptoms and no others, when asked to list all. When asked to list all transmission routes, many people were able to list individual correct ways of transmitting the virus but only 16 percent listed the correct combination. A relatively high proportion (41 percent), lacked knowledge regarding the infectiousness of asymptomatic patients, this is currently being addressed through SMS messaging and the training modules.

Most of the respondents were able to list appropriate prevention measures. That being said, only 39 percent correctly listed the correct combination of recommended prevention methods. The vast majority said they are following government prevention guidelines at all times, but further education is required, e.g. confusion over the correct recommended handwashing length should be dispelled (only 15 percent correctly said 20 seconds). Misconceptions of those individuals most at risk and measures for those who develop COVID-19 symptoms are being clarified by the updated SMS message and digital modules that are delivered weekly via upSCALE. Although many APEs could list some of the correct measures to take if symptoms occur, just 20 percent gave the correct answer when asked to list all. Awareness of risk for elderly and those with chronic diseases was high, however, when asked to list all high-risk groups, a very low proportion (less than two percent) correctly listed the elderly, obese individuals and those with chronic illnesses as being high risk groups, and no other groups. A little less than half of the respondents (40 percent) also included children as a high-risk group.

Although a high percentage of survey participants were able to list some correct COVID-19 related symptoms, transmission routes and preventions methods, the proportion who answered each specific question correctly is considerably lower than other KAP surveys conducted among HCWs (8-11). However, when reviewing the published data it is important to remember that knowledge of COVID-19 is constantly evolving and improving and KAP study results will depend largely on what

point in a country's evolution of the pandemic they occurred, making it hard to compare results. This KAP survey took place during the same time that Mozambique was effectively in lock down and opportunities for sharing information and increasing knowledge were severely restricted. Different studies use different cut off points to gauge what constitutes a 'good' understanding of COVID-19 and appropriate awareness of prevention and transmission. Furthermore, since this is the only KAP we are aware of focusing specifically on CHWs, the gap in available data about CHW COVID-19 KAP makes comparison among study results with those conducted in other countries or regions even more challenging. Additional research and information regarding KAP among CHWs are needed to be able to ensure they are getting the support necessary to effectively assist with their countries national COVID-19 response plans.

The SMS messaging content was based on WHO COVID-19 guidance, which is still evolving, therefore the development of these messages is an iterative process, and they are adapted and updated as guidance changes. The focus of the COVID-19 sensitive SMS messages have been adapted over time, based on the data flow of responses from the KAP survey, to correct any misconceptions. For example, SMS messages were sent out to reinforce the need for hand washing for a minimum of 20 seconds, to dispel myths of one minute, and reinforced messaging around the risk of transmission from asymptomatic populations.

A limitation of this KAP survey required the respondents to respond via the UpSCALE application on their functioning mobile. This limited the sample size and response rate to the survey. This could also have led to a certain level of respondent bias, as typically approximately 20% of users have non-functioning phones and limited internet access, further biasing responses towards less remote areas. We have planned to also issue a shorted KAP survey using standard SMS messaging for the second round of the KAP survey planned for November 2020, to allow more users to respond.

## Conclusions

Adaptations to the upSCALE digital platform enabled the ministry of health supported by Malaria Consortium to rapidly gather essential insight on the COVID-19 knowledge gaps and misconceptions of APEs and then to help shape and target relevant messages, vital for ensuring a successful COVID-19 response. A daily series of SMS messages (currently totally more than 140,000), developed and shaped by knowledge gaps highlighted through the KAP study, were sent to a total of approximately 2,500 APEs (including all upSCALE app users) to reinforce MoH messaging and dispel misconceptions. The messages will continue to be sent. This study demonstrates how digital health tools, in this case the upSCALE app, can be feasibly adapted to support CHWs in the COVID-19 pandemic response.

### List of Abbreviations

|            |                                                 |
|------------|-------------------------------------------------|
| APE        | Agentes polivalentes elementares                |
| CHWs       | Community health workers                        |
| COVID-19   | Coronavirus disease 2019                        |
| DHIS       | District Health Information System              |
| HCWs       | Health care workers                             |
| iCCM       | Integrated community case management            |
| KAP        | Knowledge, attitudes and practices              |
| MoH        | Ministry of Health                              |
| PPE        | Personal protective equipment                   |
| SARS-COV-2 | Severe acute respiratory syndrome coronavirus 2 |
| SMS        | Short message service                           |
| WHO        | World Health Organization                       |

## Declarations

**Ethics approval and consent to participate:** The KAP survey was conducted as a programmatic activity under the upSCALE project, which is implemented in collaboration with the Mozambique MoH, therefore separate ethics approval was not sought. The questionnaire contained a consent section that included a statement about its purpose, objectives, voluntary participation, and a declaration of confidentiality and anonymity.

**Consent for publication:** Not applicable

**Availability of data and materials:** The datasets used and/or analysed during the current study are available from the corresponding author on reasonable request.

**Competing Interests:** The authors declare that they have no competing interests

**Funding:** upSCALE is funded by UK Aid (through UNICEF) and this work was funded directly by Malaria Consortium US.

### Authors' Contributions

KB, PF, VLK, ARF, LD, JRG, HR, MR, JR, AB, CF and EZ conceived of and designed the study. PF, EZ, LD, VLK and AB were responsible for the data acquisition and quality assurance. KB, AB, PF and MF analysed and interpreted the data. All authors were responsible for drafting and approving the final draft.

### Acknowledgements

The authors would like to acknowledge Charlotte Ward who contributed to the design of the questionnaire. We also express thanks to the APEs in Mozambique who kindly participated in the study. The authors would like to thank the Ministry of Health for their support of the study.

### References

1. World Health Organization. WHO Director-General's opening remarks at the media briefing on COVID-19 - 11 March 2020 Geneva: World Health Organization,; 2020 [12/10/2020]. Available from: <https://www.who.int/dg/speeches/detail/who-director-general-s-opening-remarks-at-the-media-briefing-on-covid-19---11-march-2020>.
2. Lu H, Stratton CW, Tang Y-W. Outbreak of pneumonia of unknown etiology in Wuhan, China: The mystery and the miracle. *Journal of Medical Virology*. 2020;92(4):401-2.
3. World Health Organization. WHO Coronavirus Disease (COVID-19) Dashboard Geneva: World Health Organization; 2020 [cited 2020 12/10/2020]. Available from: <https://covid19.who.int/>.
4. European Centre for Disease Control. COVID-19 situation update worldwide Stockholm: European Centre for Disease Control; 2020 [14/10/2020]. Available from: <https://www.ecdc.europa.eu/en/geographical-distribution-2019-ncov-cases>.
5. World Health Organization. COVID-19 Situation update for the WHO African Region. World Health Organization; 2020 7/10/2020.
6. Republic of Mozambique Ministry of Health. COVID-19 - Pagina Principal: Republic of Mozambique Ministry of Health; 2020 [updated 14/10/2020; cited 2020 14/10/2020]. Available from: <https://www.misau.gov.mz/index.php/informacao-sobre-coronavirus-covid-19>.
7. Li Q, Guan X, Wu P, Wang X, Zhou L, Tong Y, et al. Early Transmission Dynamics in Wuhan, China, of Novel Coronavirus–Infected Pneumonia. *New England Journal of Medicine*. 2020;382(13):1199-207.
8. Shi H, Han X, Jiang N, Cao Y, Alwalid O, Gu J, et al. Radiological findings from 81 patients with COVID-19 pneumonia in Wuhan, China: a descriptive study. *The Lancet infectious diseases*. 2020;20(4):425-34.
9. Sahin A, Erdogan A, Agaoglu P, Dineri Y, Cakirci A, Senel M, et al. 2019 Novel Coronavirus (COVID-19) Outbreak: A Review of the Current Literature. *EJMO*. 2020;4(1):1-7.
10. Liu Y, Yan L-M, Wan L, Xiang T-X, Le A, Liu J-M, et al. Viral dynamics in mild and severe cases of COVID-19. *The Lancet infectious diseases*. 2020;20(6):656-7.
11. World Health Organization. Infection prevention and control during health care when coronavirus disease (COVID-19) is suspected or confirmed. In: Organisation WH, editor. Geneva: World Health Organization; 2020. p. 1-13.
12. Maxwell DN, Perl TM, Cutrell JB. “The Art of War” in the Era of Coronavirus Disease 2019 (COVID-19). *Clinical Infectious Diseases*. 2020.
13. Bhagavathula AS, Aldhaleei WA, Rahmani J, Mahabadi MA, Bandari DK. Knowledge and Perceptions of COVID-19 Among Health Care Workers: Cross-Sectional Study. *JMIR public health and surveillance*. 2020;6(2):e19160.
14. Olum R, Chekwech G, Wekha G, Nassozi DR, Bongomin F. Coronavirus Disease-2019: Knowledge, Attitude, and Practices of Health Care Workers at Makerere University Teaching Hospitals, Uganda. *Front Public Health*. 2020;8:181.
15. Saqlain M, Munir MM, Rehman SU, Gulzar A, Naz S, Ahmed Z, et al. Knowledge, attitude, practice and perceived barriers among healthcare workers regarding COVID-19: a cross-sectional survey from Pakistan. *Journal of Hospital Infection*. 2020;105(3):419-23.
16. Nepal R, Sapkota K, Adhikari K. Knowledge, attitude and practice regarding COVID-19 among healthcare workers in Chitwan, Nepal. 2020;Research Square.
17. Zhang M, Zhou M, Tang F, Wang Y, Nie H, Zhang L, et al. Knowledge, attitude, and practice regarding COVID-19 among healthcare workers in Henan, China. *Journal of Hospital Infection*. 2020;105(2):183-7.
18. Reuben RC, Danladi MMA, Saleh DA, Ejembi PE. Knowledge, Attitudes and Practices Towards COVID-19: An Epidemiological Survey in North-Central Nigeria. *J Community Health*. 2020:1-14.
19. Rugarabamu s, Byanaku A, Ibrahim M. Knowledge, attitudes, and practices (KAP) towards COVID-19: A quick online cross-sectional survey among Tanzanian residents. *medRxiv*. 2020:2020.04.26.20080820.

20. Zhong B-L, Luo W, Li H-M, Zhang Q-Q, Liu X-G, Li W-T, et al. Knowledge, attitudes, and practices towards COVID-19 among Chinese residents during the rapid rise period of the COVID-19 outbreak: a quick online cross-sectional survey. *Int J Biol Sci.* 2020;16(10):1745-52.
21. Lau LL, Hung N, Go DJ, Ferma J, Choi M, Dodd W, et al. Knowledge, attitudes and practices of COVID-19 among income-poor households in the Philippines: A cross-sectional study. *Journal of global health.* 2020;10(1):011007-.
22. Azlan AA, Hamzah MR, Sern TJ, Ayub SH, Mohamad E. Public knowledge, attitudes and practices towards COVID-19: A cross-sectional study in Malaysia. *PLOS ONE.* 2020;15(5):e0233668.
23. World Health Organization, Stop TBP. Advocacy, communication and social mobilization for TB control: a guide to developing knowledge, attitude and practice surveys. Geneva: World Health Organization; 2008.
24. World Health Organization. Regional Office for E. Survey tool and guidance: rapid, simple, flexible behavioural insights on COVID-19: 29 July 2020. Copenhagen; 2020 2020. Contract No.: WHO/EURO:2020-696-40431-54222.
25. Republic of Mozambique Ministry of Health. Estratégias Nacional de Resposta Comunitária à COVID-19. Maputo: Republic of Mozambique Ministry of Health; 2020.

## Annex I

### **KAP APE survey to be deployed on upSCALE platform**

Malaria Consortium, in collaboration with the Ministry of Health, is conducting a survey about the Coronavirus (COVID-19) situation in Mozambique. We would appreciate if you can take 10 minutes and complete this survey for us. Please do not start until you have enough time to complete it in one go, and note that you can stop the survey at any time. All the information we obtain will remain strictly confidential. Persons who participate in this survey are supporting the response against the spread of COVID-19.

By ticking the box, you are agreeing that you have read the above information about the survey, and that you voluntarily agree to take part.

I agree to participate in this survey.

### ***Sources of knowledge about COVID-19***

1. Where do you hear or see the messages about COVID-19? (Select all that apply)
  - a) Newspapers
  - b) Word-of-mouth (e.g. friends, family)
  - c) Government website
  - d) Local television
  - e) Local radio
  - f) Through upSCALE
  - g) Health facility
  - h) Other (please specify)
  - i) I have not heard any messages about COVID-19

### **General attitudes and practices towards COVID-19**

2. Do you adhere to the prevention measures set out by the Ministry of Health? (E.g. regular handwashing, social distancing)
  - a) Yes – all of them (*Skip to question 4*)
  - b) No
  - c) Some of them or sometimes
  - d) Don't know (*Skip to question 4*)
  
3. What is preventing you from adhering to the prevention measures set out by national health authorities?
  
4. On a scale of 1 to 5, how able to protect yourself from COVID-19 do you feel? (1 = not at all, 2 = slightly able, 3 = able, 4 = very able, 5 = fully)  
*(If answered 1, 2 or 3, skip to question 6)*

|   |   |   |   |   |
|---|---|---|---|---|
| 1 | 2 | 3 | 4 | 5 |
|---|---|---|---|---|
  
5. What is preventing you from fully protecting yourself against COVID-19? (E.g. shortage / lack of PPE, insufficient information)

### **General knowledge of COVID-19**

6. What are the *three* main clinical symptoms of COVID-19? (Select three)
  - a) Fever
  - b) Headache
  - c) Shortness of breath
  - d) Dry, persistent cough

- e) Conjunctivitis
  - f) Fatigue
  - g) Diarrhoea
  - h) Loss of speech or movement
7. Which of the below are at risk groups for COVID-19? (Select all that apply)
- a) Elderly individuals (aged >70)
  - b) Pregnant women
  - c) Those with chronic illnesses (e.g. heart disease, diabetes)
  - d) Children
  - e) Obese individuals
8. Which of the following are methods of preventing infection with COVID-19? (Select all that apply)
- a) Washing hands regularly with soap and water, or cleaning them with alcohol-based hand rub
  - b) Wearing a facemask
  - c) Avoid touching your face
  - d) Covering your mouth and nose when coughing or sneezing with the inside of the elbow or tissue
  - e) Stay home if you feel unwell
  - f) Practice physical distancing by avoiding unnecessary travel, staying away from groups exceeding 10 people and keeping 1.5m apart from others
9. How is COVID-19 transmitted? (Select all that apply)
- a) Through the air (airborne)

- b) Contact with contaminated objects and surfaces
  - c) Respiratory droplets
  - d) Direct contact through touching infected persons (e.g. handshake, hug)
  - e) Emptying latrines and handling of waste
10. What is the *minimum* length of handwashing time recommended to effectively prevent onward transmission of COVID-19?
- a) 10 seconds
  - b) 20 seconds
  - c) 30 seconds
  - d) 60 seconds
11. A person infected with COVID-19 who does not show symptoms cannot spread the coronavirus.
- a) True
  - b) False
12. If you have symptoms of COVID-19, what measures should be taken? (Select all that apply)
- a) Self-isolate by staying at home for at least 7 days
  - b) Get plenty of rest
  - c) Stay hydrated and take paracetamol
  - d) Contact your local health facility or Alô Vida via telephone
  - e) Wear a facemask
  - f) Monitor your symptoms regularly
